# Supplementary material
Source: Elsevier journal article supplement (https://www.sciencedirect.com/science/article/pii/S1665268119300638)
Supplement: mmc1 [file S1665268119300638:mmc1.doc]

# Supplementary Table 1

| **Variables** | **All****(n = 58)** | **Survivors****(n = 34)** | **Non-survivors** **(n = 24)** | ***p*** |
| --- | --- | --- | --- | --- |
| Age | 37 (26-46) | 35 (24-55) | 38(27-44) | 0.87 |
| Female | 45 (77,6%) | 25 (73,5%) | 19 (82.6%) | 0.38 |
| Aetiology:Autoimmune | 25 (43.1%) | 16 (47.1%) | 9 (37.5%) | 0.58 |
| O’Grady: Acute | 28(48.3%) | 18 (52.9%) | 8 (33.3%) | 0.39 |
| MELD | 32 (27-39) | 31.5 (27-40) | 33.5 (30-37.75) | 0.71 |
| APACHE II | 19 (14-24) | 19(12-25) | 19(17-21) | 1 |
| Creatinine > 2.0 mg/dl | 5 (8.6%) | 4 (11.8%) | 1 (4.2%) | 0.3 |
| ICP monitoring | 14 (24.1%) | 3 (8.8%) | 11 (45.8%) | **0.002** |
| Brain oedema | 24 (41.4%) | 12 (35.3%) | 12 (50%) | 0.44 |
| LT | 43 (74.1%) | 32 (94.1%) | 11 (45.8%) | **<0.0001** |
| LOS-LT | 4(2-8.25) | 3.5 (1-4.25) | 5 (3-9.75) | **0.027** |
| LOS-ICU | 11 (6.25-19.75) | 12(8.25-26.75) | 7.5(5-12.75) | **0.008** |
| LOS-Hospital | 18.5(9-29.25) | 25(18-43.25) | 7.5(5-12.75) | **<0.0001** |

# Data were expressed such as median (interquartile range) or counts (percentage), median were compared using Mann – Whitney test and the chi-square test was used for percentages comparisons. Boldface values indicate statistical significance (p < 0.05, two sided). APACHE II: Acute Physiology and Chronic Health Evaluation II at intensive care unit (ICU) admission. LT: liver transplantation. LOS: length of stay, LOS-LT: days elapsed before liver transplantation., LOS-UCI: length of stay at ICU.
